# Supplementary material for: RNA-seq data analysis of stimulated hepatocellular carcinoma cells treated with epigallocatechin gallate and fisetin reveals target genes and action mechanisms
Source: PubMed Central journal article supplement — Comput Struct Biotechnol J. 2020 Mar 18;18:686–95. doi: 10.1016/j.csbj.2020.03.006 (PMC7113608; doi:10.1016/j.csbj.2020.03.006), 2020-03-18
Supplement: mmc3.pdf [file mmc3.pdf]

# BioInfoMiner

**Subject:** Enrichment Analysis Report (extended version)

**Job tag:** Common ECGstim / FISstim vs DMSOstim 695 p.val 0.05

**Database:** Gene Ontology Biological Process (GO\_P)

**Hypergeometric p-value threshold:** 0.05

**Corrected p-value threshold:** 0.05

**Short Description:** Input genes list contained 686 genes. Excluding genes without annotation or mapping to Gene Ontology Biological Process, BioInfoMiner analyzed 611 genes and reveals 25 ontological terms as statistically significant. This enriched set of terms corresponds to 168 input genes. Significant terms, in conjunction with their correlated genes, are displayed in Table 1. A brief delineation of results is visualized in Figure 1.

**Table 1: Statistically significant terms ranking according to corrected p-value**

| Rank | Term id    | Definition                        | Enrichment | Hyp/metric pvalue | Corrected pvalue |
|------|------------|-----------------------------------|------------|-------------------|------------------|
| 1    | GO:0030198 | extracellular matrix organization | 29/195     | 1.534E-6          | 0.0013           |

| Gene Symbol | Definition                                |
|-------------|-------------------------------------------|
| TGFB2       | transforming growth factor beta 2         |
| MMP11       | matrix metalloproteinase 11               |
| ITGA2       | integrin subunit alpha 2                  |
| ITGA6       | integrin subunit alpha 6                  |
| SOX9        | SRY-box 9                                 |
| MFAP2       | microfibrillar associated protein 2       |
| ELF3        | E74 like ETS transcription factor 3       |
| LAMB2       | laminin subunit beta 2                    |
| SERPINE1    | serpin family E member 1                  |
| ADAMTSL4    | ADAMTS like 4                             |
| SPARC       | secreted protein acidic and cysteine rich |
| NID1        | nidogen 1                                 |
| CDH1        | cadherin 1                                |
| PDGFA       | platelet derived growth factor subunit A  |
| LAMA4       | laminin subunit alpha 4                   |
| CD44        | CD44 molecule (Indian blood group)        |
| COL1A1      | collagen type I alpha 1 chain             |
| COL9A2      | collagen type IX alpha 2 chain            |
| VTN         | vitronectin                               |
| DAG1        | dystroglycan 1                            |
| TNC         | tenascin C                                |
| COL16A1     | collagen type XVI alpha 1 chain           |
| OLFML2A     | olfactomedin like 2A                      |

|        |                                  |
|--------|----------------------------------|
| CCDC80 | coiled-coil domain containing 80 |
| ITGAM  | integrin subunit alpha M         |
| MMP9   | matrix metalloproteinase 9       |
| COL6A1 | collagen type VI alpha 1 chain   |
| COL6A3 | collagen type VI alpha 3 chain   |
| COL6A2 | collagen type VI alpha 2 chain   |

**2 GO:0042060 wound healing 15/85 6.815E-5 0.0037**

| Gene Symbol | Definition                                   |
|-------------|----------------------------------------------|
| TGFB1       | transforming growth factor beta 1            |
| PDGFRB      | platelet derived growth factor receptor beta |
| TGFB2       | transforming growth factor beta 2            |
| DCBLD2      | discoïdin, CUB and LCCL domain containing 2  |
| TIMP1       | TIMP metalloproteinase inhibitor 1           |
| TGFBR2      | transforming growth factor beta receptor 2   |
| SDC1        | syndecan 1                                   |
| ITGA2       | integrin subunit alpha 2                     |
| TPM1        | tropomyosin 1 (alpha)                        |
| ELK3        | ELK3, ETS transcription factor               |
| SPARC       | secreted protein acidic and cysteine rich    |
| TNC         | tenascin C                                   |
| COL1A1      | collagen type I alpha 1 chain                |
| CCL20       | C-C motif chemokine ligand 20                |
| PDGFA       | platelet derived growth factor subunit A     |

**3 GO:0045662 negative regulation of myoblast differentiation 7/21 9.753E-5 0.0056**

| Gene Symbol | Definition                        |
|-------------|-----------------------------------|
| IL18        | interleukin 18                    |
| TGFB1       | transforming growth factor beta 1 |
| ANKRD2      | ankyrin repeat domain 2           |
| NMRK2       | nicotinamide riboside kinase 2    |
| NOTCH1      | notch 1                           |
| TBX3        | T-box 3                           |
| SOX9        | SRY-box 9                         |

**4 GO:0030195 negative regulation of blood coagulation 5/11 1.880E-4 0.0069**

| Gene Symbol | Definition               |
|-------------|--------------------------|
| EDN1        | endothelin 1             |
| APOE        | apolipoprotein E         |
| SERPINE1    | serpin family E member 1 |
| SERPINE2    | serpin family E member 2 |
| VTN         | vitronectin              |

**5**      **GO:0030325**      **adrenal gland develop-  
ment**      **6/20**      **5.920E-4**      **0.0096**

| Gene Symbol | Definition                                                                      |
|-------------|---------------------------------------------------------------------------------|
| MDK         | midkine (neurite growth-promoting factor 2)                                     |
| ARID5B      | AT-rich interaction domain 5B                                                   |
| HMGA2       | high mobility group AT-hook 2                                                   |
| FSTL3       | follistatin like 3                                                              |
| CITED2      | Cbp/p300 interacting transactivator with Glu/Asp rich carboxy-terminal domain 2 |
| TSPO        | translocator protein                                                            |

**6**      **GO:0008360**      **regulation of cell  
shape**      **19/138**      **2.551E-4**      **0.0097**

| Gene Symbol | Definition                                           |
|-------------|------------------------------------------------------|
| DLG1        | discs large MAGUK scaffold protein 1                 |
| MYH10       | myosin heavy chain 10                                |
| EPB41L3     | erythrocyte membrane protein band 4.1 like 3         |
| MYH14       | myosin heavy chain 14                                |
| FMNL3       | formin like 3                                        |
| SLC9A3R1    | SLC9A3 regulator 1                                   |
| MYH9        | myosin heavy chain 9                                 |
| RDX         | radixin                                              |
| TPM1        | tropomyosin 1 (alpha)                                |
| SHROOM3     | shroom family member 3                               |
| MSN         | moesin                                               |
| PTK2B       | protein tyrosine kinase 2 beta                       |
| GNA12       | G protein subunit alpha 12                           |
| EPS8        | epidermal growth factor receptor pathway substrate 8 |
| FGD1        | FYVE, RhoGEF and PH domain containing 1              |
| WIPF1       | WAS/WASL interacting protein family member 1         |
| PLXNB2      | plexin B2                                            |
| SEMA4D      | semaphorin 4D                                        |
| LIMD1       | LIM domains containing 1                             |

**7**      **GO:0060412**      **ventricular septum  
morphogenesis**      **7/28**      **7.034E-4**      **0.014**

| Gene Symbol | Definition                                                                      |
|-------------|---------------------------------------------------------------------------------|
| TGFBR2      | transforming growth factor beta receptor 2                                      |
| TGFB2       | transforming growth factor beta 2                                               |
| FZD1        | frizzled class receptor 1                                                       |
| NOTCH1      | notch 1                                                                         |
| TBX3        | T-box 3                                                                         |
| CITED2      | Cbp/p300 interacting transactivator with Glu/Asp rich carboxy-terminal domain 2 |
| SOX4        | SRY-box 4                                                                       |

**8**      **GO:0043122**      **regulation of I-kappaB kinase/NF-kappaB signaling**      **5/14**      **7.075E-4**      **0.015**

| Gene Symbol | Definition                                   |
|-------------|----------------------------------------------|
| F2RL1       | F2R like trypsin receptor 1                  |
| OPTN        | optineurin                                   |
| IL1B        | interleukin 1 beta                           |
| CPNE1       | copine 1                                     |
| HSPB1       | heat shock protein family B (small) member 1 |

**9**      **GO:0007565**      **female pregnancy**      **13/86**      **9.521E-4**      **0.0174**

| Gene Symbol | Definition                                    |
|-------------|-----------------------------------------------|
| PGF         | placental growth factor                       |
| TGFB1       | transforming growth factor beta 1             |
| ITGA2       | integrin subunit alpha 2                      |
| GJB2        | gap junction protein beta 2                   |
| NAMPT       | nicotinamide phosphoribosyltransferase        |
| ETS1        | ETS proto-oncogene 1, transcription factor    |
| FOSL1       | FOS like 1, AP-1 transcription factor subunit |
| STS         | steroid sulfatase (microsomal), isozyme S     |
| COL16A1     | collagen type XVI alpha 1 chain               |
| AGT         | angiotensinogen                               |
| PSG2        | pregnancy specific beta-1-glycoprotein 2      |
| PSG4        | pregnancy specific beta-1-glycoprotein 4      |
| PSG1        | pregnancy specific beta-1-glycoprotein 1      |

**10**      **GO:0033627**      **cell adhesion mediated by integrin**      **4/9**      **9.734E-4**      **0.0174**

| Gene Symbol | Definition                      |
|-------------|---------------------------------|
| ITGA2       | integrin subunit alpha 2        |
| COL16A1     | collagen type XVI alpha 1 chain |
| ITGA6       | integrin subunit alpha 6        |
| VTN         | vitronectin                     |

**11**      **GO:0001558**      **regulation of cell growth**      **11/69**      **1.471E-3**      **0.0188**

| Gene Symbol | Definition                                   |
|-------------|----------------------------------------------|
| MAD2L2      | MAD2 mitotic arrest deficient-like 2 (yeast) |
| EPB41L3     | erythrocyte membrane protein band 4.1 like 3 |
| CRIM1       | cysteine rich transmembrane BMP regulator 1  |
| SGK1        | serum/glucocorticoid regulated kinase 1      |
| WISP2       | WNT1 inducible signaling pathway protein 2   |

|        |                                              |
|--------|----------------------------------------------|
| TMC8   | transmembrane channel like 8                 |
| TMEM97 | transmembrane protein 97                     |
| IGFBP3 | insulin like growth factor binding protein 3 |
| CTGF   | connective tissue growth factor              |
| IGFBP4 | insulin like growth factor binding protein 4 |
| AGT    | angiotensinogen                              |

|           |                   |                                                                  |             |                 |               |
|-----------|-------------------|------------------------------------------------------------------|-------------|-----------------|---------------|
| <b>12</b> | <b>GO:0032270</b> | <b>positive regulation of cellular protein metabolic process</b> | <b>5/15</b> | <b>1.013E-3</b> | <b>0.0214</b> |
|-----------|-------------------|------------------------------------------------------------------|-------------|-----------------|---------------|

| <b>Gene Symbol</b> | <b>Definition</b>                 |
|--------------------|-----------------------------------|
| TGFB1              | transforming growth factor beta 1 |
| PTK2B              | protein tyrosine kinase 2 beta    |
| AGT                | angiotensinogen                   |
| CSF1               | colony stimulating factor 1       |
| INHBA              | inhibin beta A subunit            |

|           |                   |                                      |             |                 |               |
|-----------|-------------------|--------------------------------------|-------------|-----------------|---------------|
| <b>13</b> | <b>GO:0000188</b> | <b>inactivation of MAPK activity</b> | <b>6/25</b> | <b>2.127E-3</b> | <b>0.0257</b> |
|-----------|-------------------|--------------------------------------|-------------|-----------------|---------------|

| <b>Gene Symbol</b> | <b>Definition</b>                        |
|--------------------|------------------------------------------|
| SPRED1             | sprouty related EVH1 domain containing 1 |
| SPRED2             | sprouty related EVH1 domain containing 2 |
| DUSP8              | dual specificity phosphatase 8           |
| DUSP5              | dual specificity phosphatase 5           |
| DUSP7              | dual specificity phosphatase 7           |
| DUSP6              | dual specificity phosphatase 6           |

|           |                   |                                      |             |                 |               |
|-----------|-------------------|--------------------------------------|-------------|-----------------|---------------|
| <b>14</b> | <b>GO:0043691</b> | <b>reverse cholesterol transport</b> | <b>5/18</b> | <b>2.510E-3</b> | <b>0.0277</b> |
|-----------|-------------------|--------------------------------------|-------------|-----------------|---------------|

| <b>Gene Symbol</b> | <b>Definition</b>                         |
|--------------------|-------------------------------------------|
| CLU                | clusterin                                 |
| ABCA5              | ATP binding cassette subfamily A member 5 |
| APOE               | apolipoprotein E                          |
| APOA2              | apolipoprotein A2                         |
| ABCA1              | ATP binding cassette subfamily A member 1 |

|           |                   |                                              |              |                 |               |
|-----------|-------------------|----------------------------------------------|--------------|-----------------|---------------|
| <b>15</b> | <b>GO:0030336</b> | <b>negative regulation of cell migration</b> | <b>13/94</b> | <b>2.180E-3</b> | <b>0.0279</b> |
|-----------|-------------------|----------------------------------------------|--------------|-----------------|---------------|

| <b>Gene Symbol</b> | <b>Definition</b>                 |
|--------------------|-----------------------------------|
| TCAF1              | TRPM8 channel associated factor 1 |
| DPYSL3             | dihydropyrimidinase like 3        |

|          |                                                                                 |
|----------|---------------------------------------------------------------------------------|
| ENG      | endoglin                                                                        |
| SLC9A3R1 | SLC9A3 regulator 1                                                              |
| TPM1     | tropomyosin 1 (alpha)                                                           |
| NISCH    | nischarin                                                                       |
| PKP2     | plakophilin 2                                                                   |
| BST2     | bone marrow stromal cell antigen 2                                              |
| CITED2   | Cbp/p300 interacting transactivator with Glu/Asp rich carboxy-terminal domain 2 |
| TIE1     | tyrosine kinase with immunoglobulin like and EGF like domains 1                 |
| PTPRK    | protein tyrosine phosphatase, receptor type K                                   |
| SERPINE1 | serpin family E member 1                                                        |
| DAG1     | dystroglycan 1                                                                  |

**16 GO:0030335 positive regulation of cell migration 20/180 2.704E-3 0.0279**

| Gene Symbol | Definition                                   |
|-------------|----------------------------------------------|
| PDGFRB      | platelet derived growth factor receptor beta |
| SEMA3C      | semaphorin 3C                                |
| SEMA3B      | semaphorin 3B                                |
| PDGFA       | platelet derived growth factor subunit A     |
| RDX         | radixin                                      |
| TGFB1       | transforming growth factor beta 1            |
| MYO1C       | myosin 1C                                    |
| CSF1        | colony stimulating factor 1                  |
| MCAM        | melanoma cell adhesion molecule              |
| NOTCH1      | notch 1                                      |
| PODXL       | podocalyxin like                             |
| EDN1        | endothelin 1                                 |
| PTK2B       | protein tyrosine kinase 2 beta               |
| ETS1        | ETS proto-oncogene 1, transcription factor   |
| COL1A1      | collagen type I alpha 1 chain                |
| PDCD10      | programmed cell death 10                     |
| F2RL1       | F2R like trypsin receptor 1                  |
| SEMA4C      | semaphorin 4C                                |
| SEMA4D      | semaphorin 4D                                |
| FERMT3      | fermitin family member 3                     |

**17 GO:0009612 response to mechanical stimulus 10/64 2.769E-3 0.0308**

| Gene Symbol | Definition                                                                      |
|-------------|---------------------------------------------------------------------------------|
| TGFBR2      | transforming growth factor beta receptor 2                                      |
| SOST        | sclerostin                                                                      |
| JUND        | JunD proto-oncogene, AP-1 transcription factor subunit                          |
| PTK2B       | protein tyrosine kinase 2 beta                                                  |
| ETS1        | ETS proto-oncogene 1, transcription factor                                      |
| FOSL1       | FOS like 1, AP-1 transcription factor subunit                                   |
| TNC         | tenascin C                                                                      |
| COL1A1      | collagen type I alpha 1 chain                                                   |
| ANGPT2      | angiopoietin 2                                                                  |
| CITED2      | Cbp/p300 interacting transactivator with Glu/Asp rich carboxy-terminal domain 2 |

|           |                   |                                                                             |            |                 |               |
|-----------|-------------------|-----------------------------------------------------------------------------|------------|-----------------|---------------|
| <b>18</b> | <b>GO:0060762</b> | <b>regulation of branching involved in mammary gland duct morphogenesis</b> | <b>3/6</b> | <b>3.059E-3</b> | <b>0.0319</b> |
|-----------|-------------------|-----------------------------------------------------------------------------|------------|-----------------|---------------|

| <b>Gene Symbol</b> | <b>Definition</b> |
|--------------------|-------------------|
|--------------------|-------------------|

|       |                                   |
|-------|-----------------------------------|
| TGFB1 | transforming growth factor beta 1 |
| ETV5  | ETS variant 5                     |
| ETV4  | ETS variant 4                     |

|           |                   |                                                            |             |                 |               |
|-----------|-------------------|------------------------------------------------------------|-------------|-----------------|---------------|
| <b>19</b> | <b>GO:0014911</b> | <b>positive regulation of smooth muscle cell migration</b> | <b>5/19</b> | <b>3.251E-3</b> | <b>0.0355</b> |
|-----------|-------------------|------------------------------------------------------------|-------------|-----------------|---------------|

| <b>Gene Symbol</b> | <b>Definition</b> |
|--------------------|-------------------|
|--------------------|-------------------|

|        |                                              |
|--------|----------------------------------------------|
| PDGFRB | platelet derived growth factor receptor beta |
| ITGA2  | integrin subunit alpha 2                     |
| FOXO4  | forkhead box O4                              |
| NRP1   | neuropilin 1                                 |
| VTN    | vitronectin                                  |

|           |                   |                           |               |                 |               |
|-----------|-------------------|---------------------------|---------------|-----------------|---------------|
| <b>20</b> | <b>GO:0098609</b> | <b>cell-cell adhesion</b> | <b>27/276</b> | <b>3.558E-3</b> | <b>0.0358</b> |
|-----------|-------------------|---------------------------|---------------|-----------------|---------------|

| <b>Gene Symbol</b> | <b>Definition</b> |
|--------------------|-------------------|
|--------------------|-------------------|

|         |                                                       |
|---------|-------------------------------------------------------|
| USP8    | ubiquitin specific peptidase 8                        |
| KTN1    | kinectin 1                                            |
| SPTAN1  | spectrin alpha, non-erythrocytic 1                    |
| EPHA2   | EPH receptor A2                                       |
| ITGA6   | integrin subunit alpha 6                              |
| HSPA1A  | heat shock protein family A (Hsp70) member 1A         |
| STXBP6  | syntaxin binding protein 6                            |
| NDRG1   | N-myc downstream regulated 1                          |
| VASP    | vasodilator-stimulated phosphoprotein                 |
| EHD1    | EH domain containing 1                                |
| CGN     | cingulin                                              |
| PPL     | periplakin                                            |
| PPME1   | protein phosphatase methylesterase 1                  |
| PERP    | PERP, TP53 apoptosis effector                         |
| ZC3HAV1 | zinc finger CCCH-type containing, antiviral 1         |
| EPB41L1 | erythrocyte membrane protein band 4.1 like 1          |
| IDH1    | isocitrate dehydrogenase (NADP(+)) 1, cytosolic       |
| RDX     | radixin                                               |
| RPL15   | ribosomal protein L15                                 |
| SND1    | staphylococcal nuclease and tudor domain containing 1 |
| MMP24   | matrix metalloproteinase 24                           |
| EPS8L2  | EPS8 like 2                                           |
| CALD1   | caldesmon 1                                           |
| SHTN1   | shootin 1                                             |
| CNN3    | calponin 3                                            |

KIF5B  
PPFIBP1

kinesin family member 5B  
PPFIA binding protein 1

**21**      **GO:0010595**      **positive regulation of endothelial cell migration**      **8/46**      **3.643E-3**      **0.0373**

**Gene Symbol**

**Definition**

---

|       |                                                        |
|-------|--------------------------------------------------------|
| ANXA3 | annexin A3                                             |
| PTK2B | protein tyrosine kinase 2 beta                         |
| SPARC | secreted protein acidic and cysteine rich              |
| GPLD1 | glycosylphosphatidylinositol specific phospholipase D1 |
| EDN1  | endothelin 1                                           |
| AGT   | angiotensinogen                                        |
| NRP1  | neuropilin 1                                           |
| ETS1  | ETS proto-oncogene 1, transcription factor             |

**22**      **GO:0001568**      **blood vessel development**      **9/57**      **4.122E-3**      **0.0382**

**Gene Symbol**

**Definition**

---

|        |                                                                                 |
|--------|---------------------------------------------------------------------------------|
| TGFB2  | transforming growth factor beta receptor 2                                      |
| PLPP3  | phospholipid phosphatase 3                                                      |
| LAMA4  | laminin subunit alpha 4                                                         |
| TGFB2  | transforming growth factor beta 2                                               |
| EPHA2  | EPH receptor A2                                                                 |
| TBX3   | T-box 3                                                                         |
| COL1A1 | collagen type I alpha 1 chain                                                   |
| CITED2 | Cbp/p300 interacting transactivator with Glu/Asp rich carboxy-terminal domain 2 |
| TIE1   | tyrosine kinase with immunoglobulin like and EGF like domains 1                 |

**23**      **GO:0001525**      **angiogenesis**      **23/227**      **4.425E-3**      **0.042**

**Gene Symbol**

**Definition**

---

|          |                                                                       |
|----------|-----------------------------------------------------------------------|
| TGFB2    | transforming growth factor beta 2                                     |
| EPHA2    | EPH receptor A2                                                       |
| PTK2B    | protein tyrosine kinase 2 beta                                        |
| PDCD10   | programmed cell death 10                                              |
| SERPINE1 | serpin family E member 1                                              |
| ECSCR    | endothelial cell surface expressed chemotaxis and apoptosis regulator |
| FMNL3    | formin like 3                                                         |
| MYH9     | myosin heavy chain 9                                                  |
| HTATIP2  | HIV-1 Tat interactive protein 2                                       |
| ARHGAP22 | Rho GTPase activating protein 22                                      |
| ANGPT2   | angiopoietin 2                                                        |
| PDGFA    | platelet derived growth factor subunit A                              |
| ENG      | endoglin                                                              |
| MCAM     | melanoma cell adhesion molecule                                       |
| PLCD3    | phospholipase C delta 3                                               |



|       |                                                                 |
|-------|-----------------------------------------------------------------|
| VEGFC | vascular endothelial growth factor C                            |
| NRP1  | neuropilin 1                                                    |
| IL18  | interleukin 18                                                  |
| ROBO4 | roundabout guidance receptor 4                                  |
| ELK3  | ELK3, ETS transcription factor                                  |
| CTGF  | connective tissue growth factor                                 |
| ANPEP | alanyl aminopeptidase, membrane                                 |
| TIE1  | tyrosine kinase with immunoglobulin like and EGF like domains 1 |

|           |                   |                                                             |             |                 |               |
|-----------|-------------------|-------------------------------------------------------------|-------------|-----------------|---------------|
| <b>24</b> | <b>GO:0032967</b> | <b>positive regulation of collagen biosynthetic process</b> | <b>5/20</b> | <b>4.138E-3</b> | <b>0.0428</b> |
|-----------|-------------------|-------------------------------------------------------------|-------------|-----------------|---------------|

| <b>Gene Symbol</b> | <b>Definition</b>                            |
|--------------------|----------------------------------------------|
| TGFB1              | transforming growth factor beta 1            |
| PDGFRB             | platelet derived growth factor receptor beta |
| ITGA2              | integrin subunit alpha 2                     |
| CTGF               | connective tissue growth factor              |
| ENG                | endoglin                                     |

|           |                   |                                            |             |                 |               |
|-----------|-------------------|--------------------------------------------|-------------|-----------------|---------------|
| <b>25</b> | <b>GO:0016525</b> | <b>negative regulation of angiogenesis</b> | <b>9/59</b> | <b>5.212E-3</b> | <b>0.0479</b> |
|-----------|-------------------|--------------------------------------------|-------------|-----------------|---------------|

| <b>Gene Symbol</b> | <b>Definition</b>                                                     |
|--------------------|-----------------------------------------------------------------------|
| TIE1               | tyrosine kinase with immunoglobulin like and EGF like domains 1       |
| ECSCR              | endothelial cell surface expressed chemotaxis and apoptosis regulator |
| EPHA2              | EPH receptor A2                                                       |
| SPARC              | secreted protein acidic and cysteine rich                             |
| FOXO4              | forkhead box O4                                                       |
| ANGPT2             | angiopoietin 2                                                        |
| AGT                | angiotensinogen                                                       |
| NPPB               | natriuretic peptide B                                                 |
| AMOT               | angiomotin                                                            |
